# Supplementary material for: Urine CA125 and HE4 for the Triage of Symptomatic Women with Suspected Endometrial Cancer
Source: MDPI journal article supplement (doi:10.3390/cancers14143306), 2022-07-06
Supplement: s1 [file s1]

Article

# Urine CA125 and HE4 for the Triage of Symptomatic Women with Suspected Endometrial Cancer

Kelechi Njoku, Chloe E. Barr, Caroline J. J Sutton and Emma J. Crosbie

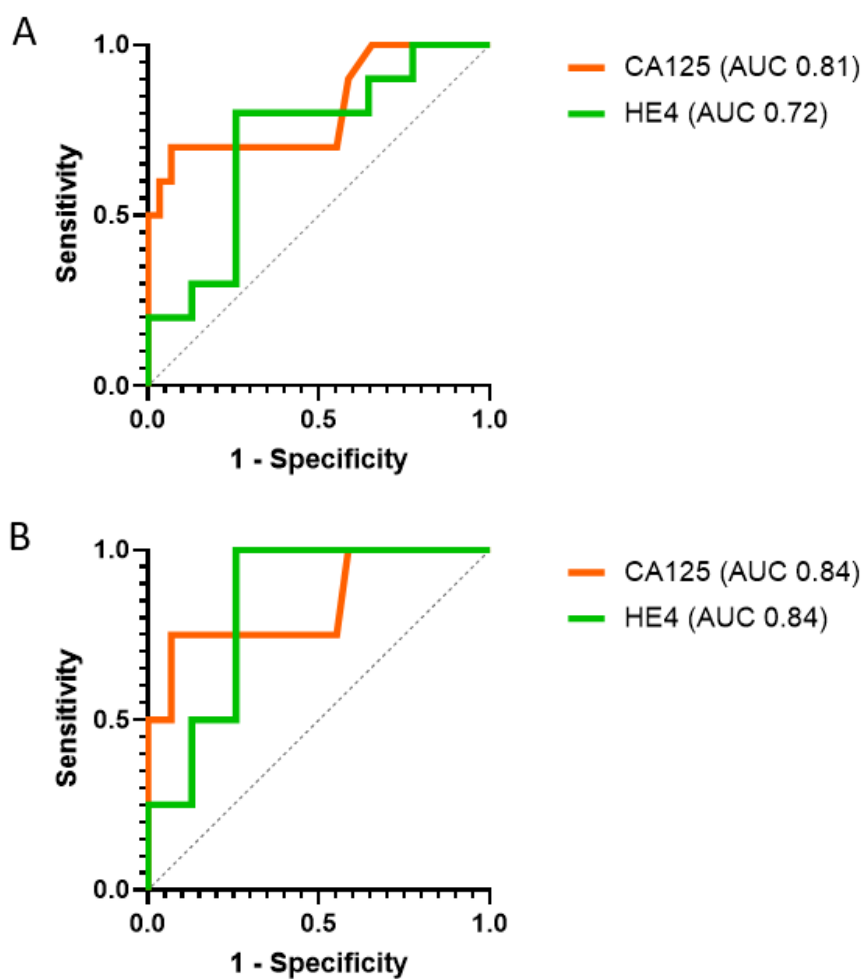

**Figure S1.** ROC curve analysis of urine CA125 and HE4 for (A) the detection of Type II endometrial cancer and (B) advanced stage (FIGO III/IV) disease.

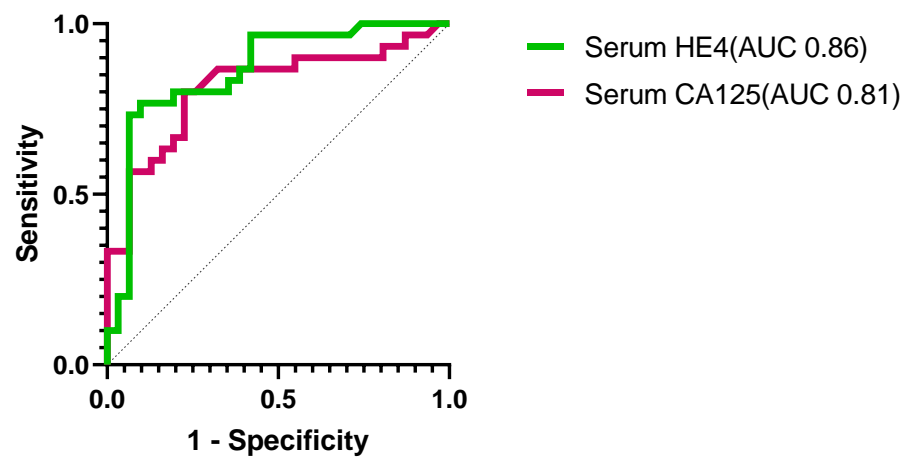

**Figure S2.** ROC curve analyses of serum CA125 and HE4 for the detection of endometrial cancer.

**Table S1.** Diagnostic performance of urine CA125 and HE4 levels based on logistic regression in the discovery cohort.

| Model                                     | Prediction     | Crude OR<br>(95%CI) | Crude<br><i>p</i> -value | Adjusted OR<br>(95%CI) | Adjusted <i>p</i> -value |
|-------------------------------------------|----------------|---------------------|--------------------------|------------------------|--------------------------|
| Based on optimal diagnostic thresholds    |                |                     |                          |                        |                          |
| CA125                                     | Disease status | 27(6.8,107.3)       | <0.001                   | 42(7.2,247)            | <0.001                   |
| HE4                                       |                | 6.7(2.2,20.6)       | 0.001                    | 8.9(2.3,35.1)          | 0.002                    |
| Based on CA125 and HE4 as continuous data |                |                     |                          |                        |                          |
| CA125                                     | Disease status | 1.4(1.1,1.7)        | 0.002                    | 1.5(1.2,1.9)           | 0.002                    |
| HE4                                       |                | 1.05(1.0,1.09)      | 0.04                     | 1.05(1.00,1.07)        | 0.049                    |

Adjusted models include age, BMI and T2DM status.
